# Supplementary material for: Effects of Air Purifiers on Patients with Allergic Rhinitis: a Multicenter, Randomized, Double-Blind, and Placebo-Controlled Study
Source: PubMed Central journal article supplement — Yonsei Med J. 2020 Jul 28;61(8):689–97. doi: 10.3349/ymj.2020.61.8.689 (PMC7393300; doi:10.3349/ymj.2020.61.8.689), 2020-07-28
Supplement: ymj-61-689-s001.pdf [file ymj-61-689-s001.pdf]

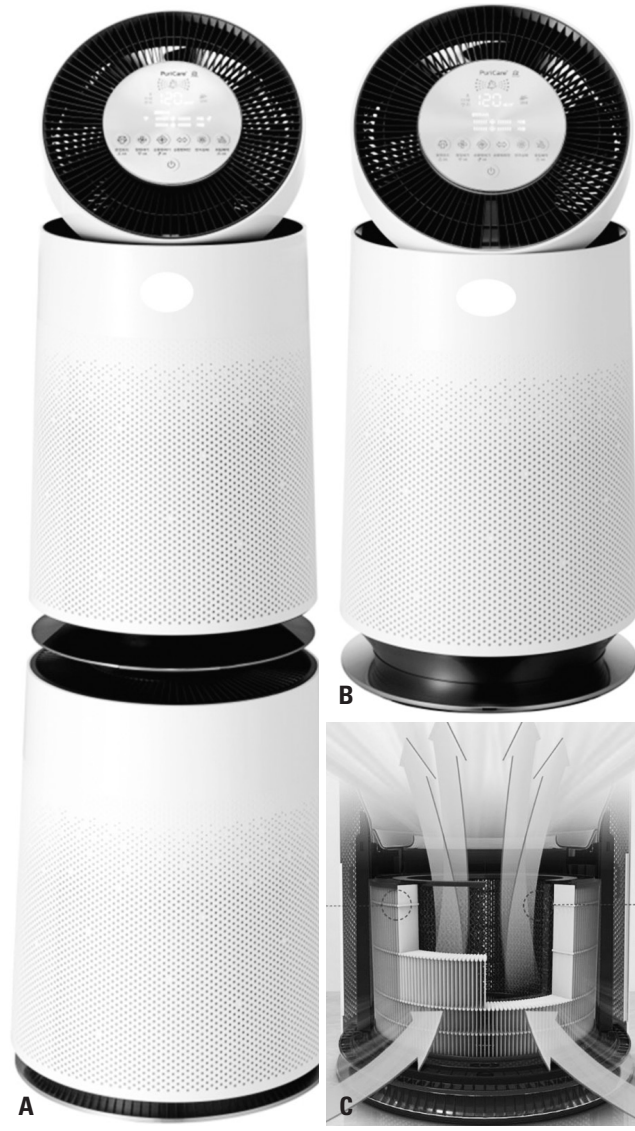

**Supplementary Fig. 1.** Air purifiers in living room (A) and bedroom (B); high-efficiency particulate air filters and airflow (C).
