# Supplementary material for: Effects of Air Purifiers on Patients with Allergic Rhinitis: a Multicenter, Randomized, Double-Blind, and Placebo-Controlled Study
Source: PubMed Central journal article supplement — Yonsei Med J. 2020 Jul 28;61(8):689–97. doi: 10.3349/ymj.2020.61.8.689 (PMC7393300; doi:10.3349/ymj.2020.61.8.689), 2020-07-28
Supplement: ymj-61-689-s003.pdf [file ymj-61-689-s003.pdf]

**Supplementary Table 1.** Correlation between Outdoor and Indoor (Bed-Room or Living Room) PM Levels

|                                              | <b>Outdoor PM</b> | <b><i>p</i> value*</b> |
|----------------------------------------------|-------------------|------------------------|
| Correlation coefficient of PM <sub>2.5</sub> |                   |                        |
| Bedroom                                      | 0.3525            | <0.001                 |
| Living room                                  | 0.1605            | <0.001                 |
| Correlation coefficient of PM <sub>10</sub>  |                   |                        |
| Bedroom                                      | 0.2930            | <0.001                 |
| Living room                                  | 0.1450            | <0.001                 |

PM, particulate matter.

\**p*-value was calculated via pearson correlation.
